# Supplementary material for: China Stroke Registry for Patients With Traditional Chinese Medicine (CASES-TCM): Rationale and Design of a Prospective, Multicenter, Observational Study
Source: Frontiers journal article supplement (doi:10.3389/fphar.2021.743883), 2021-08-31
Supplement: Table_1.pdf [file Table_1.pdf]

## Supplementary file

### List of participating sites in the CASES-TCM study.

| Province, Autonomous Region, and Special Administrative Region | Number of sites | Participating sites                                                                   |
|----------------------------------------------------------------|-----------------|---------------------------------------------------------------------------------------|
| Beijing                                                        | 13              | Dongzhimen Hospital, Beijing University of Chinese Medicine (Tongzhou District)       |
|                                                                |                 | Dongzhimen Hospital, Beijing University of Chinese Medicine                           |
|                                                                |                 | Beijing University of Chinese Medicine Third Affiliated Hospital                      |
|                                                                |                 | Xuanwu Hospital affiliated to Capital Medical University                              |
|                                                                |                 | Dongfang Hospital, Beijing University of Chinese Medicine                             |
|                                                                |                 | Beijing Mentougou Hospital of Traditional Chinese Medicine                            |
|                                                                |                 | Beijing Tibetan Hospital                                                              |
|                                                                |                 | Fangshan Hospital, Beijing University of Chinese Medicine                             |
|                                                                |                 | Shunyi Hospital, Beijing Traditional Chinese Medicine Hospital                        |
|                                                                |                 | Beijing Huairou Hospital of Traditional Chinese Medicine                              |
|                                                                |                 | Beijing First Hospital of Integrated Traditional Chinese and Western Medicine         |
|                                                                |                 | Beijing Hepingli Hospital                                                             |
|                                                                |                 | Beijing Chaoyang Integrative Medicine Emergency Medical Center                        |
| Liaoning                                                       | 8               | The Second Affiliated Hospital of Liaoning University of Traditional Chinese Medicine |
|                                                                |                 | Anshan Hospital of Traditional Chinese Medicine                                       |
|                                                                |                 | Dalian Hospital of Integrated Traditional Chinese and Western Medicine                |
|                                                                |                 | Dalian Hospital of Traditional Chinese Medicine                                       |
|                                                                |                 | Dandong Hospital of Traditional Chinese Medicine                                      |
|                                                                |                 | Yingkou Hospital of Traditional Chinese Medicine                                      |
|                                                                |                 | Sujiatun Hospital of Traditional Chinese Medicine                                     |
|                                                                |                 | Benxi Center Hospital                                                                 |
| Shandong                                                       | 8               | The Second Affiliated Hospital of Shandong University of Traditional Chinese Medicine |

|           |   |                                                                                      |
|-----------|---|--------------------------------------------------------------------------------------|
|           |   | Shandong Provincial Qianfoshan Hospital                                              |
|           |   | Tai'an Hospital of Traditional Chinese Medicine                                      |
|           |   | Weifang Hospital of Traditional Chinese Medicine                                     |
|           |   | Rizhao Hospital of Traditional Chinese Medicine                                      |
|           |   | Zibo Hospital of Traditional Chinese Medicine                                        |
|           |   | Yantai Yuhuangding Hospital                                                          |
|           |   | Affiliated Hospital of Shandong University of Traditional Chinese Medicine           |
| Guangdong | 7 | Nanfang Hospital, Southern Medical University                                        |
|           |   | Foshan Hospital of Traditional Chinese Medicine                                      |
|           |   | Wuyi Hospital of Traditional Chinese Medicine                                        |
|           |   | Guangdong Province Traditional Chinese Medical Hospital                              |
|           |   | The First Affiliated Hospital of Guangzhou University of Chinese Medicine            |
|           |   | The Affiliated Traditional Chinese Medicine Hospital of Guangzhou Medical University |
|           |   | Shenzhen Hospital, Beijing University of Chinese Medicine                            |
| Hubei     | 7 | Hubei Provincial Hospital of Traditioanl Chinese Medicine                            |
|           |   | Ezhou Hospital of Traditional Chinese Medicine                                       |
|           |   | Wuhan Hospital of Traditional Chinese and Western Medicine                           |
|           |   | Wuhan Hospital of Traditional Chinese Medicine                                       |
|           |   | Xiangyang Hospital of Traditional Chinese Medicine                                   |
|           |   | Renmin Hospital of Wuhan University                                                  |
|           |   | Hubei Provincial Hospital of Integrated Chinese and Western Medicine                 |
| Hebei     | 6 | Handan Hospital of Traditional Chinese Medicine                                      |
|           |   | Hebei Yiling Hospital                                                                |
|           |   | Traditional Chinese Medicine Hospital of Shijiazhuang City                           |
|           |   | Qian'an City Hospital of Traditional Chinese Medicine                                |
|           |   | Tangshan Hospital of Traditional Chinese Medicine                                    |
|           |   | Qinhuangdao Hospital of Traditional Chinese Medicine                                 |
| Henan     | 6 | The first Affiliated Hospital of Henan University of Chinese Medicine                |
|           |   | Henan Province Hospital of Traditional Chinese Medicine                              |
|           |   | Luoyang Second Hospital of Traditional Chinese Medicine                              |

|           |   |                                                                                |
|-----------|---|--------------------------------------------------------------------------------|
|           |   | Zhengzhou Traditional Chinese Medicine Hospital                                |
|           |   | Zhumadian Traditional Chinese Medicine Hospital                                |
|           |   | Jiaozuo Hospital of Traditional Chinese Medicine                               |
| Guangxi   | 6 | The First Affiliated Hospital of Guangxi University of Chinese Medicine        |
|           |   | Ruikang Hospital Affiliated to Guangxi University of Chinese Medicine          |
|           |   | The First Affiliated Hospital of Guangxi Medical University                    |
|           |   | Traditional Chinese Medicine Hospital of Yulin                                 |
|           |   | Liuzhou Traditional Chinese Medical Hospital                                   |
|           |   | Nanning Hospital of Traditional Chinese Medicine                               |
| Sichuan   | 5 | Hospital (T.C.M.) Affiliated to Southwest Medical University                   |
|           |   | Chengdu University of Traditional Chinese Medicine Affiliated Hospital         |
|           |   | Chengdu Intergrated Traditional Chinese Medicine and Western Medicine Hospital |
|           |   | Luzhou Hospital of Traditional Chinese Medicine                                |
|           |   | Panzhihua Center Hospital                                                      |
| Shaanxi   | 5 | Shaanxi Provincial Hospital of Chinese Medicine                                |
|           |   | Affiliated Hospital of Shaanxi University of Chinese Medicine                  |
|           |   | Xi'an Hospital of Traditional Chinese Medicine                                 |
|           |   | Xi'an Traditional Chinese Medicine Brain Disease Hospital                      |
|           |   | Ankang Hospital of Traditional Chinese Medicine                                |
| Shanghai  | 5 | Zhongshan Hospital, Fudan University                                           |
|           |   | Shanghai Hospital of Traditional Chinese Medicine                              |
|           |   | Shanghai Putuo District Hospital of Traditional Chinese Medicine               |
|           |   | Shanghai Xuhui District Hospital of Traditional Chinese Medicine               |
|           |   | Shuguang Hospital, Shanghai University of Traditional Chinese Medicine         |
| Chongqing | 5 | Chongqing Traditional Chinese Medicine Hospital                                |
|           |   | Beipei Traditional Chinese Medical Hospital                                    |
|           |   | Fuling Traditional Chinese Medical Hospital                                    |
|           |   | Chongqing Hospital of Integrated Traditional Chinese and Western Medicine      |
|           |   | Dianjiang Hospital of Traditional Chinese Medicine                             |
| Anhui     | 4 | The First Affiliated Hospital of Anhui University of Chinese Medicine          |
|           |   | Chuzhou Hospital of Integrated Traditional Chinese and Western Medicine        |

|                |   |                                                                                                               |
|----------------|---|---------------------------------------------------------------------------------------------------------------|
|                |   | Guoyang Hospital of Traditional Chinese Medicine                                                              |
|                |   | The Second Affiliated Hospital of Anhui University of Chinese Medicine                                        |
| Hunan          | 4 | Xiangya Hospital Central South University                                                                     |
|                |   | The Second Hospital of Hunan University of Chinese Medicine                                                   |
|                |   | Hunan Academy of Traditional Chinese Medicine Affiliated Hospital                                             |
|                |   | Liling Hospital of Traditional Chinese Medicine                                                               |
| Zhejiang       | 4 | Zhejiang Provincial Hospital of Chinese Medicine                                                              |
|                |   | Yiwu Hospital of Traditional Chinese Medicine                                                                 |
|                |   | Zhejiang Geriatric Care Hospital                                                                              |
|                |   | Tongde Hospital of Zhejiang Province                                                                          |
| Shanxi         | 4 | The Third Traditional Chinese Medicine Hospital of Shanxi University of Chinese Medicine                      |
|                |   | Integrated Traditional Chinese and Western Medicine Affiliated to Shanxi University of Chinese Medicine       |
|                |   | Shanxi University of Chinese Medicine Affiliated Hospital                                                     |
|                |   | Affiliated Hospital of Changzhi Institute of Traditional Chinese Medicine                                     |
| Inner Mongolia | 4 | Hulun Buir Hospital of Traditional Chinese and Inner Mongolian Medicine                                       |
|                |   | Inner Mongolia International Mongolian Hospital                                                               |
|                |   | Inner Mongolia Hospital of Traditional Chinese Medicine                                                       |
|                |   | Hohhot Hospital of Inner Mongolian Medicine and Traditional Chinese Medicine                                  |
| Heilongjiang   | 4 | The Second Affiliated Hospital of Heilongjiang University of Chinese Medicine                                 |
|                |   | Harbin Traditional Chinese Medicine Hospital                                                                  |
|                |   | Jixi Hospital of Traditional Chinese Medicine                                                                 |
|                |   | The First Affiliated Hospital of Heilongjiang University of Chinese Medicine                                  |
| Tianjin        | 3 | Second Affiliated Hospital of Tianjin University of Traditional Chinese Medicine                              |
|                |   | Tianjin Hospital of ITCWM Nankai Hospital                                                                     |
|                |   | Wuqing Traditional Chinese Medicine Hospital Affiliated to Tianjin University of Traditional Chinese Medicine |
|                |   | Lianyungang Hospital of Traditional Chinese Medicine                                                          |

|           |     |                                                                                           |
|-----------|-----|-------------------------------------------------------------------------------------------|
| Jiangsu   | 3   | Nanjing Hospital of Chinese Medicine Affiliated to Nanjing University of Chinese Medicine |
|           |     | Taizhou Hospital of Traditional Chinese Medicine                                          |
| Jilin     | 2   | Changchun University of Chinese Medicine Affiliated Hospital                              |
|           |     | Yanji Hospital of Traditional Chinese Medicine                                            |
| Jiangxi   | 2   | Nanchang Hongdu Hospital of Traditional Chinese Medicine                                  |
|           |     | Jiujiang Hospital of Traditional Chinese Medicine                                         |
| Gansu     | 2   | Gansu Provincial Hospital of Traditional Chinese Medicine                                 |
|           |     | Tianshui Hospital of Traditional Chinese Medicine                                         |
| Fujian    | 2   | Quanzhou Hospital of Traditional Chinese Medicine                                         |
|           |     | Xiamen Traditional Chinese Medicine Hospital, Beijing University of Chinese Medicine      |
| Ningxia   | 1   | Guyuan Hospital of Traditional Chinese Medicine                                           |
| Hainan    | 1   | Chinese Medicine Hospital of Hainan Province                                              |
| Guizhou   | 1   | The First Affiliated Hospital of Guizhou University of Traditional Chinese Medicine       |
| Yunnan    | 1   | Yunnan Provincial Hospital of Traditional Chinese Medicine                                |
| Xinjiang  | 1   | Traditional Chinese Medicine Hospital of Xinjiang Uygur Autonomous Region                 |
| Tibet     | 1   | Tibet Autonomous Region Tibetan Hospital                                                  |
| Qinghai   | 1   | Qinghai Hospital of Traditional Chinese Medicine                                          |
| Hong Kong | 0   | /                                                                                         |
| Macao     | 0   | /                                                                                         |
| Taiwan    | 0   | /                                                                                         |
| In total  | 126 |                                                                                           |
